1        **Repetitive transcranial magnetic stimulation to the motor cortex leads to a**  
2        **sequential increase in phase synchronization and power of TMS-evoked**  
3        **electroencephalographic recordings.**

4  
5 Enrico De Martino<sup>1</sup>, Adenauer Girardi Casali<sup>2</sup>, Bruno Andry Nascimento Couto<sup>1</sup>, Thomas Graven-  
6 Nielsen<sup>1</sup>, Daniel Ciampi de Andrade<sup>1</sup>

7  
8 <sup>1</sup>Center for Neuroplasticity and Pain (CNAP), Department of Health Science and Technology,  
9 Faculty of Medicine, Aalborg University, Aalborg, Denmark

10 <sup>2</sup>Institute of Science and Technology, Federal University of São Paulo, São Paulo, Brazil

11  
12 **Corresponding author**

13 Daniel Ciampi de Andrade  
14 Center for Neuroplasticity and Pain (CNAP)  
15 Department of Health Science and Technology  
16 Faculty of Medicine, Aalborg University  
17 Selma Lagerløfs Vej 249  
18 9260 Gistrup  
19 Denmark  
20 Email: [dca@hst.aau.dk](mailto:dca@hst.aau.dk)

21  
22 **Keywords (maximum of 6 keywords)**

23 transcranial magnetic stimulation, electroencephalogram, time-frequency analysis, phase reset,  
24 effective connectivity, natural frequency.

25  
26 **Declarations of interest:** none.

27  
28 **Funding:** The Center for Neuroplasticity and Pain (CNAP) is supported by the Danish National  
29 Research Foundation (DNRF121). The current study is supported by a Novo Nordisk (Grant  
30 NNF21OC0072828) and ERC Horizon Europe Consolidator grant (PersoNINpain 101087925).

32 **ABSTRACT**

33 **Background:** High-frequency (10 Hz) repetitive transcranial magnetic stimulation (rTMS) to the  
34 primary motor cortex (M1) is used to treat several neuropsychiatric disorders, but its main mechanism  
35 of action remains unclear.

36 **Objective:** To probe four cortical hubs used for rTMS (M1; dorsolateral-prefrontal cortex, DLPFC;  
37 anterior cingulate cortex, ACC; posterosuperior insula, PSI) with TMS coupled with high-density  
38 electroencephalography (TMS-EEG) and measure cortical excitability and oscillatory dynamics  
39 before and after active and sham rTMS to M1.

40 **Methods:** Before and immediately after active or sham M1-rTMS (15 min, 3,000 pulses at 10 Hz),  
41 single-pulse TMS evoked EEG were recorded at the four targets in 20 healthy individuals. Measures  
42 of cortical excitability and oscillatory dynamics were extracted at the main frequency bands ( $\alpha$  [8-13  
43 Hz], low- $\beta$  [14-24 Hz], high- $\beta$  [25-35 Hz]).

44 **Results:** Comparing active and sham M1 rTMS, M1 TMS-EEG demonstrated an increase in high- $\beta$   
45 synchronization in electrodes around M1 stimulation area and remotely in the contralateral  
46 hemisphere ( $p=0.026$ ). The increase in high- $\beta$  synchronization (48-83 ms after TMS-EEG  
47 stimulation) was succeeded by an enhancement in low- $\beta$  power (86-144 ms after TMS-EEG  
48 stimulation) both locally and in the contralateral hemisphere ( $p=0.006$ ). No significant differences  
49 were observed in TMS-EEG responses probing DLPFC, ACC, or PSI.

50 **Conclusion:** M1-rTMS engaged a sequence of enhanced phase synchronization, followed by an  
51 increase in power occurring within M1, that spread to remote areas and was measurable after the end  
52 of the stimulation session. These results are relevant to understanding the M1 neuroplastic effects of  
53 rTMS and associated changes in cortical activity dynamics.

54

55 **INTRODUCTION**

56 High-frequency (10 Hz) repetitive transcranial magnetic stimulation (rTMS) to the primary motor  
57 cortex (M1) is a non-invasive neuromodulation technique able to induce analgesic effects [1] and has  
58 therapeutic potentials in chronic pain, stroke rehabilitation, and movement disorders, among others  
59 [2]. Although still unclear, rTMS-induced analgesia may provoke long-lasting cortical plastic  
60 changes by repetitively depolarizing myelinated axons in M1 [3], probably via Hebbian synaptic  
61 plasticity mechanisms [4]. Previous studies based on motor-evoked potentials (MEPs) and intra-  
62 cortical excitability demonstrated that M1 rTMS increased corticomotor excitability [5] and  
63 normalized reduced intra-cortical excitability in chronic pain [6]. Importantly, M1 is highly connected  
64 to cognitive and somatosensory networks, including interoceptive and nociceptive top-down  
65 modulatory areas [7], and it is thus currently assumed that M1 stimulation has significant modulatory  
66 effects in extra-motor corticospinal networks [8].

67       Recent advancements in TMS-compatible electroencephalography (TMS-EEG) have opened  
68 the possibility of directly assessing cortical responses to a probing pulse of TMS both at the  
69 stimulation site and remotely, which can open new perspectives in studying the rTMS mechanisms.  
70 TMS-EEG allows for the measurement of cortical excitability and connectivity with enough temporal  
71 resolution to early and later evoked responses in motor and extra-motor areas [9]. The technique  
72 involves the application of sub-threshold TMS single pulses to a targeted cortical area under the  
73 recording of EEG to assess the ensuing changes in cortical neural activity [10]. Averaged cortical  
74 responses, known as TMS-evoked EEG potentials (TEPs), are waveforms derived from time-locked  
75 and phase-locked EEG segments to TMS pulses, which are particularly effective for examining  
76 cortical excitability [11]. Furthermore, TMS-EEG also provides the opportunity to explore the  
77 frequency content of evoked cortical oscillations both locally in the stimulated area and globally  
78 across cortical regions connected to the stimulated cortical target [9].

79       In M1, the dominant oscillation is within the  $\beta$ -band [12,13], which involves pyramidal neurons,  
80 as evidenced by corticomuscular coherence [14]. However, M1 also expresses an important  
81 oscillatory activity within the  $\alpha$ -band, also termed mu-rhythm, which is related to the integration of  
82 somatosensory stimuli in a manner like the modulation of visual perception by occipital  $\alpha$  oscillations  
83 [15]. Previous studies combining TMS-EEG to M1 with continuous theta burst stimulation (TBS)  
84 have shown a significant increase in power in beta frequency [16] and a reduction in alpha power and  
85 phase synchronization in the stimulation site [16,17]. By contrast, intermittent TBS has reported a  
86 decrease in power in  $\alpha$ -band frequencies in the electrodes located away from the stimulation site [18].

87 Furthermore, studies combining TMS to M1 with functional resonance magnetic imaging (fMRI)  
88 have also demonstrated that TMS led to BOLD changes in functionally connected cortical non-motor  
89 regions, such as the insular, prefrontal, and cingulate regions [19,20]. However, the fine-grained  
90 temporal dynamics of these correlations and their directionality remain largely unknown.

91 Here, we investigated whether M1-rTMS influenced cortical excitability and oscillatory  
92 dynamics within the  $\alpha$ - and  $\beta$ -bands in healthy individuals by probing motor and extra-motor  
93 (dorsolateral prefrontal, anterior cingulate, and posterior insular) cortices with TMS-EEG in a sham-  
94 controlled setting.

95

96 **METHODS**

97 ***Participants***

98 This study included 20 healthy adults (12 females). Age, height, and weight (mean  $\pm$  SD) were 25 $\pm$ 4  
99 years, 173 $\pm$ 12.6 cm, and 67 $\pm$ 15 kg. None of the participants were on medications, and the exclusion  
100 criteria were non-systemic diseases and neuropsychiatric disorders, known pregnancy, and any  
101 contraindications to TMS [21]. The local ethics committee approved the study (N-20220018), and  
102 the protocol was registered at ClinicalTrials.gov (NCT05714020). The sample size was determined  
103 based on the calculation of the difference between two dependent means. Based on the analgesic  
104 effect of rTMS applied to M1 (a reduction of 1.5 points in pain intensity on the numeric rating scale  
105 with a standard deviation of 1.8 at the end of the treatment [22]), an effect size of active rTMS to M1  
106 was estimated to be 0.83. Using G\*Power for statistical power analysis with a power of 0.80, alpha  
107 level of 0.05, and effect size of 0.80, a minimum of 14 participants was necessary.

108

109 ***Study design***

110 The present study involved two experimental sessions separated by one week. In the first visit,  
111 participants were randomly assigned to either sham or active rTMS to the left M1, with 10 participants  
112 receiving sham rTMS first. All participants received the other rTMS protocol during the second visit.  
113 Both active and sham rTMS procedures, as well as participant instructions, were kept consistent  
114 across groups. Before and after the rTMS intervention, three TMS-EEG assessments on three distinct  
115 left cortical areas were performed: First, the dorsolateral prefrontal cortex (DLPFC) and M1 regions  
116 were stimulated in a randomized order in all 20 participants (10 receiving DLPFC stimulation first).  
117 In order to collect the post-measurement assessments within 1 hour after rTMS, half of the  
118 participants underwent TMS-EEG to the anterior cingulate cortex (ACC), while the second half  
119 underwent the posterosuperior insula (PSI). Each TMS-EEG protocol took approximately 8 minutes,  
120 and 5-minute breaks were ensured between runs. MEPs were assessed both before and after TMS-  
121 EEG measurements.

122

123 ***Repetitive Transcranial Magnetic Stimulation***

124 Magstim Super Rapid<sub>2</sub> Plus<sub>1</sub> stimulator (Magstim Company Ltd) with a figure-of-eight-shaped coil  
125 (70-mm Double Air Film Coil) was used for rTMS (15 min of stimulation, targeting the hot spot of  
126 the right first dorsal interosseous (FDI) muscle, 30 trains of 10-s pulses at 10 Hz frequency and 20-s  
127 intervals between trains, totaling 3000 pulses) [2]. Stimulation intensity was 90% of the resting motor

128 threshold (rMT). For sham stimulations, a coil identical in size, color, shape, and mimicking the active  
129 coil sound (70-mm double air film sham coil) was used.

130

### 131 *Corticospinal excitability*

132 Silver chloride electrodes (Ambu Neuroline 720) were placed on the right FDI muscle fibers. Single-  
133 pulse TMS was delivered using the rTMS device and a figure-of-eight shaped coil D70<sup>2</sup>. The hotspot  
134 of the FDI muscle was determined as the coil position that evoked a maximal peak-to-peak MEP for  
135 a given stimulation intensity. The rMT was the lowest TMS intensity that could produce MEPs  
136 exceeding 50  $\mu$ V in half of the trials [23]. Ten pulses were delivered at 120% and 140% of rMT.

137

### 138 *Electroencephalographic recordings of TMS-evoked potentials*

139 Electroencephalograms were recorded using a TMS-compatible amplifier (g.HIamp EEG amplifier,  
140 g.tec medical engineering GmbH) with a passive electrode cap (64 electrodes, Easycap) placed  
141 according to the 10-5 system, with the Cz electrode on the vertex. The ground electrode was placed  
142 on the right zygoma, the online reference was on the right mastoid process, and two electrodes on the  
143 lateral side of the eyes recorded the electrooculogram. Electrode impedance was kept under 5 k $\Omega$ .  
144 Raw signals were amplified and sampled at a rate of 4800 Hz.

145 TMS was delivered using the same biphasic stimulator as used for rTMS with a figure-eight  
146 coil to stimulate DLPFC and M1 (D70<sup>2</sup> coil) and a double-cone coil (D110 cone-coil) to stimulate the  
147 ACC and PSI targets. During recordings, participants sat on an ergonomic armchair and were  
148 instructed to gaze at a fixation spot on the wall to reduce oculomotor muscle activity. The TMS-click  
149 sound masking toolbox (TAAC; [24]) with noise-cancellation in-ear headphones (ER3C Etymotic 50  
150 Ohm) were used to mitigate auditory responses to TMS coil clicks. An EEG net cap (GVB-geliMED  
151 GmbH) with a plastic stretch wrap film was applied over the EEG cap to reduce somatosensory  
152 artifacts triggered by coil contact with electrodes.

153 TMS-neuronavigation (Brainsight TMS Neuronavigation, Rogue Research Inc.) was used to  
154 target the cortical spots between assessments. For M1, TMS-evoked potentials were obtained from  
155 motor hotspots (Fig. 1A) at 90% of rMT. The DLPFC target was identified on the middle frontal  
156 gyrus, based on the method described by Mylius et al. [25], with TMS intensity set to 110% of the  
157 rMT of the FDI muscle (Fig. 2A). The ACC target was identified 4 cm in front of the hotspot of the  
158 tibialis anterior (TA) muscle scalp representation [26] (Fig. 3A). The hotspot of the TA muscle was  
159 determined as the coil position that evoked a TA-evoked response for a given stimulation intensity.

160 The rMT of the TA muscle was determined as the lowest TMS intensity to produce visible muscle  
161 responses, and TMS-EEG was performed at 90% of the TA rMT. The PSI target was identified as  
162 previously described [27] (Fig 4A), and stimulation was similarly set at 90% of the TA rMT.

163 A real-time visualization tool (rt-TEP) was used to ensure detectable TMS-evoked potentials in  
164 all cortical targets [10]. This allowed for monitoring the quality of the recordings and allowed for  
165 minor adjustments in TMS coil angulation and orientation, ensuring the presence of early peak-to-  
166 peak TMS-evoked potentials (average of 20 trials) at the nearest electrode to the stimulation area.  
167 The TMS-neuronavigation and rt-TEP were utilized throughout the study to monitor the TMS coil  
168 location and the highest signal-to-noise ratio in EEG recordings. Approximately 160-180 pulses were  
169 administered for each condition, with interstimulus intervals randomly jittered between 2600 and  
170 3400 ms [28].

171 Pre-processing was performed using customized algorithms based on the EEGLab toolbox [29]  
172 running on Matlab R2019b (The MathWorks). EEG signals were segmented into trials of 1600 ms  
173 around the TMS pulse, which occurred at time zero ( $\pm 800$  ms). In the M1 TMS-EEG epoch, a segment  
174 of the pre-TMS EEG signal (-11 to -3 ms) was used to substitute the peri-TMS EEG recordings from  
175 -2 to 6 ms [30]. The same procedure was applied for deep TMS targets (ACC and PSI) in a larger  
176 peri-TMS interval (0-20 ms) to adapt to the double-cone coil electric field. Epochs and channels with  
177 noise, eye blinks, eye movements, or muscle artifacts were identified and removed. The EEG data  
178 were band-pass filtered (1-80 Hz, Butterworth, 3rd order), down sampled to 1200 Hz, re-referenced  
179 to average reference, baseline corrected, and merged for the two conditions (Pre- and Post-rTMS).  
180 Independent component analysis (ICA, EEGLAB runica function) was applied to the combined  
181 dataset to remove additional residual artifacts [13]. The dataset was divided into the original Pre- and  
182 Post-rTMS conditions, and the epochs were re-segmented to the window of  $\pm 600$  ms surrounding the  
183 TMS pulse. Lastly, signals from any disconnected or high-impedance channels were interpolated  
184 using spherical splines [29].

185 To assess the global cortical excitability, global-mean field power (GMFP) was calculated as  
186 the root-mean-squared value of the TEP across all electrodes in the 20-300 ms time interval after  
187 TMS stimulation [13]. To assess the local cortical excitability, the local mean field power (LMFP)  
188 was calculated across the electrodes close to the TMS coil in the 20-300 ms time interval after TMS  
189 stimulation [13]. For M1 stimulation, C1, C3, Cp3, Cp1 electrodes were selected, likewise for DLPFC  
190 (AF3, F3, F1, FC3, FC1), ACC (FCz, Cz, FC1, FC2, C1, C2), and PSI (FC7, F C3, C7, C5, C3).

191 Time-frequency maps were extracted between 8 and 45 Hz using Morlet wavelets with 3.5  
192 cycles, as implemented in the EEGLAB toolbox and previously reported [31]. The following TMS-  
193 evoked EEG parameters were extracted in the time-frequency domain:

- 194 - Event-related spectral perturbation (ERSP) was calculated to quantify power amplitudes in  
195 the frequency domain. ERSP was computed from the time-frequency maps as the average  
196 spectral power ratio of individual EEG trials relative to the pre-stimulus period (-600 to -50  
197 ms). ERSP allows the identification of the changes in power as a function of time and  
198 frequency [9,31]. The significance of ERSP maps with respect to the baseline was assessed  
199 by bootstrapping samples from the pre-stimulus period (500 permutations, two-sided  
200 comparison, p-value < 0.05 after false discovery rate (FDR) correction for multiple  
201 comparisons). Mean power spectra were then calculated by averaging significant ERSP values  
202 across electrodes and time samples (Fig. 1B, 2B, 3B, 4B).
- 203 - Inter-trial coherence (ITC) was extracted as a measure of phase synchronization. ITC was  
204 calculated by normalizing the complex-valued single-trial time-frequency values by their  
205 corresponding moduli and taking the absolute value of the across-trials averaged results. The  
206 significance of ITC maps with respect to the baseline was assessed by bootstrapping samples  
207 from the pre-stimulus period (500 permutations, one-sided p-value < 0.05 after FDR), and  
208 significant ITC values were averaged across electrodes, time samples, and frequency bands  
209 (Fig. 1C, 2C, 3C, 4C).

210 To investigate if the observed changes in ERSP and ITC were not due to volume conduction from a  
211 common source activity, the weighted Phase Lag Index (wPLI) was also calculated. wPLI assesses  
212 the asymmetry of the phase difference distribution between pairs of EEG signals, which is indicative  
213 of phase synchronization between electrodes free from zero-lag components. For each session, wPLI  
214 was calculated as described by Vinck et al. (2011) [32]. The resulting connectivity matrix was then  
215 averaged across each time window of interest for both electrodes belonging to the same cluster (intra-  
216 cluster) and for different clusters (inter-cluster). The clusters and time windows were chosen based  
217 on a cluster analysis (details in the *Statistical Analysis* section).

218

### 219 ***Statistical analysis***

220 Matlab and Statistical Package for Social Sciences (SPSS, version 25; IBM) were used for statistical  
221 analyses. Data are presented as mean  $\pm$  standard deviation. For cortical excitability (global and local  
222 mean field power), phase-based connectivity analysis (wLPI), and MEPs amplitude, Student's paired



223 t-tests were used to compare the absolute changes from pre-stimulation (Post- vs. Pre-rTMS) between  
224 active and sham stimulations. For the time-frequency analysis, three distinct frequency bands,  $\alpha$  (8–  
225 13 Hz), low- $\beta$  (14–24 Hz), and high- $\beta$  (25–35 Hz), were selected a priori, and a spatiotemporal group-  
226 level comparison of ERSP and ITC, averaged across frequency bands, was performed between active  
227 and sham rTMS using a non-parametric permutation test, corrected for multiple comparisons through  
228 cluster-based statistics [33] as implemented in the open-source FieldTrip Toolbox [34]. The test  
229 consisted of two levels: first-level t-statistics and cluster-level statistics. The first-level statistics  
230 quantifies the effect at each spatiotemporal sample, establishing a threshold for identifying samples  
231 as members of clusters. Spatiotemporal samples with first-level statistics considered significant  
232 ( $p < 0.05$ ; two-sided) were grouped based on temporal and spatial adjacency (minimum of two  
233 channels per cluster). The sum of first-level statistics within each cluster was used as cluster-level  
234 statistics and compared to the maximum distribution of values obtained after randomizing data across  
235 types of stimulations (Monte Carlo approximation with 5000 random permutations). The cluster  
236 analysis was applied to subject-normalized ERSP and ITC maps, which were constructed by  
237 subtracting the pre-rTMS (active or sham) individual maps from the corresponding post-rTMS maps.  
238 Clusters were significant when the observed summed statistics exceeded 95% of the values resulting  
239 from random permutations.

240

241 **RESULTS**

242 All participants completed all TMS-EEG assessments and both sham and active rTMS to M1 without  
243 adverse effects. Repetitive TMS intensities were  $62.1 \pm 8.3\%$  for sham and  $62.5 \pm 8.1\%$  for active  
244 rTMS. The TMS-evoked potential intensities for each cortical area and the average number of artifact-  
245 free epochs are reported in Supplementary Tables 1 and 2. Data from three subjects were excluded  
246 due to TMS-EPs peak-to-peak amplitude not reaching  $6 \mu\text{V}$  [10].

247  
248 *Effects of M1 rTMS on M1 TMS-EEG and MEPs*

249 Local and global mean field power analyses did not show significant differences between active and  
250 sham rTMS (Supplementary Fig. 1). Data-driven analyses for group-level comparisons of ERSP and  
251 ITC revealed a difference in the high- $\beta$  band in the ITC in the time interval 48-83 ms. Furthermore,  
252 in the low- $\beta$  band, ERSP also revealed a difference in the time interval 86-144 ms. Topographic plots  
253 for M1 TMS probing revealed the electrodes where differences were present (Fig. 5), allowing their  
254 grouping into distinct clusters and two equal time intervals: early (48-83 ms) and late (86-144 ms)  
255 intervals. A significant increase in high- $\beta$  band early (48-83 ms) phase reset (ITC) after active rTMS  
256 was detected compared to sham in the left central cluster ( $t(16) = 3.258$ ;  $p = 0.005$ ; electrodes: C3,  
257 C5, Cp3, and Cp5), in the left frontal cluster ( $t(16) = 2.446$ ;  $p = 0.026$ ; electrodes: Af3, F1 and F3),  
258 and in the right frontal cluster ( $t(16) = 4.052$ ;  $p = 0.001$ ; electrodes: Af4, F2 and F4). These changes  
259 were temporally followed (86-144 ms) by an increase in lower- $\beta$  band later power (ERSP) after active  
260 rTMS compared with sham in the left centro-parietal cluster ( $t(16) = 2.943$ ;  $p = 0.009$ ; electrodes:  
261 C1, C3, Cp1, Cp3, P1, and P3), right centro-parietal cluster ( $t(16) = 3.683$ ;  $p = 0.002$ ; electrodes: C2,  
262 C4, Cp2, Cp4, P2, and P4), and left prefrontal cluster ( $t(16) = 4.684$ ;  $p = 0.001$ ; electrodes: Fp1, Af3,  
263 and Af7) (non-normalized parameters are reported in Table 1 and 2).

264 Phase-based connectivity analyses confirmed the sequential events described above in high- $\beta$   
265 band wPLI after active rTMS compared with sham between the left central cluster (peri-stimulation  
266 site) and left prefrontal cluster both at early ( $t(16) = 2.490$ ;  $p = 0.024$ ) and late ( $t(16) = 2.181$ ;  $p = 0.044$ )  
267 time intervals. These findings were similarly followed by an increase in high- $\beta$  ( $t(16) = 3.533$ ;  $p =$   
268  $0.003$ ) and low- $\beta$  ( $t(16) = 2.511$ ;  $p = 0.023$ ) band wPLI after active rTMS between the left central  
269 cluster (peri-stimulation site) and right centro-parietal cluster at the late time interval (non-normalized  
270 parameters are reported in Table 3). Absolute changes in MEP amplitudes were not significant  
271 (Supplementary Tables 3).

272

273 *Effects of M1 rTMS on DLPFC, ACC, and PSI TMS-EEG*

274 Local and global mean field power analysis (Supplementary Fig. 2, 3, and 4) and the time-frequency  
275 analyses did not show any significant difference between active and sham rTMS in any of the three  
276 other cortical areas proved with TMS-EEG.

277

278 **DISCUSSION**

279 The present study provides original insights into both the local and remote connectivity changes  
280 immediately after a session of M1-rTMS at 10Hz. Initial increases in faster  $\beta$ -band intertrial  
281 coherence occurred in electrodes around M1 and in the ipsilateral frontal and homologous  
282 contralateral hemispheres. Initial increases in intertrial coherence were followed by increases in  
283 power in the slower  $\beta$ -band, observable locally in the prefrontal ipsilateral and peri-motor  
284 contralateral hemispheres. Phase-based connectivity analyses further supported that active rTMS  
285 increased phase lagging between the stimulated M1 area and remote extra-motor areas. Contrarily,  
286 cortical responses to extra-motor probing (DLPFC, ACC, and PSI) were not significantly affected by  
287 rTMS to M1, suggesting that connectivity changes were mainly measurable in M1-related networks.

288

289 *Effects of M1 rTMS on M1  $\beta$ -band oscillatory activity*

290 The current results demonstrated that active 10 Hz rTMS to M1 did not significantly enhance the  $\alpha$ -  
291 band oscillation in electrodes close to the stimulation area via causal entrainment of brain oscillations  
292 similar to what has been observed in the parietal cortex [35] or in previous studies using continuous  
293 and intermittent TBS [16–18]. Instead, M1-rTMS increased high  $\beta$ -band oscillatory synchronization  
294 and low  $\beta$ -band oscillatory power. Previous studies combining TMS-EEG with continuous and  
295 intermittent TBS used TMS intensities above the rest of the motor threshold, which provokes muscle  
296 contractions. Consequently, the extent to which the reported changes were influenced by sensory  
297 refference from the periphery, or the spinal cord is unclear. A previous study applying single pulses  
298 TMS or trains of rhythmic or arrhythmic rTMS to M1 at  $\sim 18$  Hz (peak of individual participant's  
299 resting-state beta oscillation) also triggered an increase in beta power on resting EEG, independently  
300 of the pattern of stimulation [36]. These results [36], and our own, corroborate the concept that beta  
301 oscillatory response after M1-rTMS reflects potentiation of the endogenous M1's  $\beta$ -band natural  
302 oscillatory activity, regardless of rTMS frequency. This supports the idea that the after-effects of  
303 rTMS delivered at frequencies  $\sim 10$ -20Hz are related to the M1 main frequency rather than to effects  
304 linked to the stimulation frequency band. This is in line with frequency ranges found to have  
305 therapeutic values for chronic pain management by M1 rTMS(see for review [1]).

306 An important finding of the current study is the increase in high  $\beta$ -band oscillatory  
307 synchronization after active rTMS. ITC is a measure computed from single-trial cortical responses,  
308 reflecting the temporal and spectral synchronization within the EEG response, and indicating the  
309 extent to which underlying phase-locking occurs, providing a direct measure of cortical synchrony

310 [29]. High  $\beta$ -band oscillatory synchronization in cortical regions has previously been demonstrated  
311 to play a crucial role in interregional cortical communication and function, and their coordination  
312 across regions and inter-regional coordination jointly improve behavioral performance [37]. Thus,  
313 the increased high  $\beta$ -band oscillatory synchronization found in the current study could be  
314 hypothesized as an increase in communication-through-coherence between M1 and its connected  
315 areas [38]. The communication-through-coherence theory suggests that brain rhythms encompass  
316 distinctly increased excitation and inhibition phases, and inputs are most effective when timed to  
317 coincide with excitation phases and not with phases of inhibition [39]. This optimal timing can occur  
318 if the inputs are rhythmic, thereby influencing synchronized rhythms in the target brain regions [37].

319 Another main finding of the current study was the increase in high- $\beta$  synchronization after  
320 active rTMS followed by an increase in low- $\beta$  band power. This temporal interaction between cortical  
321 rhythms may indicate a cross-frequency coupling from a faster to a slower rhythmic state. It is well-  
322 known that cross-frequency coupling is a crucial mechanism for interaction between the many  
323 discrete frequencies of rhythm observable in neocortical networks [40]. In animal and human studies,  
324 phase–amplitude coupling has been observed, converging on the notion that it plays an important  
325 functional role in local computation and long-range communication in large-scale brain networks  
326 [41].

327 A final relevant finding of the current study was the increased  $\beta$ -band connectivity, as measured  
328 by wPLI, across several different clusters of electrodes after active rTMS. The phase-based  
329 connectivity analysis suggests that this effect was not produced by volume conduction and that the  
330 increase in  $\beta$ -band oscillatory synchronization and power after rTMS do not originate from the  
331 directly targeted cortex but also from remote cortical regions, allowing the inference of effective  
332 connectivity changes and driving the changes in its interconnected areas. This is supported by a large  
333 body of animal and human evidence [8,42] showing that pain analgesia and somatosensory effects of  
334 M1 stimulation are dependent on the engagement of extra-motor areas and diffuse effects such as the  
335 release of endogenous opioids [43]. In fact, it was suggested that M1 has areas that are highly  
336 connected to the extra motor (e.g., cognitive control, interoceptive, pain modulatory) network [44],  
337 which could be central to the clinical effects reported to date after M1 rTMS [22].

### 338 339 *Effects of M1 rTMS on DLPFC, ACC, and PSI oscillatory activity*

340 No significant changes in cortical excitability or oscillations were found when TMS probed DLPFC,  
341 ACC, and PSI after M1 rTMS. Previous concurrent TMS-fMRI studies have shown that TMS can

342 induce neurovascular responses in functionally connected non-motor areas, including the insula,  
343 cingulate cortex, frontal and parietal cortices [19,45]. A recent study has shown that TMS over M1,  
344 synchronized with fMRI acquisition, led to increased activation in the bilateral insula [20].  
345 Additionally, dynamic causal modeling indicated direct inputs from M1 to the insula and ACC [46].  
346 Despite this evidence of activation in connected cortical regions, our study did not capture any  
347 neuroplastic effects in these areas following 10 Hz rTMS to M1. This could be due to the transient  
348 nature of the effects or the need for multiple rTMS sessions to induce lasting neuroplastic changes.

349

### 350 ***Limitations***

351 The main limitation of the present study is the absence of behavioral assessment. This was an active  
352 choice in the design of the study, given that the connectivity changes after M1 rTMS were mainly  
353 unknown, while the behavioral effects after M1 stimulation have been previously described [47].  
354 Furthermore, only M1 was targeted with rTMS. Considering that responsiveness to active rTMS may  
355 vary significantly across different cortical areas based on endogenous oscillation, future research  
356 should investigate the effects of targeting different cortical areas, such as DLPFC, ACC, or PSI, which  
357 could induce different cortical responses. Finally, only 10 participants underwent TMS-EEG  
358 targeting the ACC and PSI since the post-rTMS effect on M1 is short-lasting [48].

359

### 360 ***Conclusions***

361 Compared to sham-rTMS, active M1 rTMS engaged an enhanced TMS-synchronization, followed by  
362 an increase in TMS-evoked power amplitude occurring within M1 main frequencies and spreading to  
363 remote connected areas.

364

365 **CRedit author statement**

366 **Enrico De Martino:** Conceptualization, Methodology, Formal analysis, Investigation, Data curation,  
367 Visualization, Writing- Original draft preparation; Writing - Review & Editing; Project  
368 administration; **Adenauer Girardi Casali:** Methodology, Software; Formal analysis; Data Curation;  
369 Visualization, Writing - Review & Editing; **Bruno Andry Nascimento Couto:** Software, Formal  
370 analysis, Data Curation, Visualization, Writing - Review & Editing, Visualization; **Thomas Graven-**  
371 **Nielsen:** Conceptualization, Methodology, Writing - Review & Editing, Funding acquisition; **Daniel**  
372 **Ciampi de Andrade:** Conceptualization, Methodology, Visualization, Writing- Original draft  
373 preparation; Writing - Review & Editing; Project administration, Funding acquisition.  
374

375 **REFERENCES**

- 376 [1] Ciampi de Andrade D, García-Larrea L. Beyond trial-and-error: Individualizing therapeutic  
 377 transcranial neuromodulation for chronic pain. *European Journal of Pain (United Kingdom)*  
 378 2023;27:1065–83. <https://doi.org/10.1002/ejp.2164>.
- 379 [2] Lefaucheur JP, Aleman A, Baeken C, Benninger DH, Brunelin J, Di Lazzaro V, et al. Evidence-  
 380 based guidelines on the therapeutic use of repetitive transcranial magnetic stimulation  
 381 (rTMS): An update (2014–2018). *Clinical Neurophysiology* 2020;131:474–528.  
 382 <https://doi.org/10.1016/j.clinph.2019.11.002>.
- 383 [3] Siebner HR, Funke K, Aberra AS, Antal A, Bestmann S, Chen R, et al. Transcranial magnetic  
 384 stimulation of the brain: What is stimulated? – A consensus and critical position paper.  
 385 *Clinical Neurophysiology* 2022;140:59–97. <https://doi.org/10.1016/j.clinph.2022.04.022>.
- 386 [4] Klomjai W, Katz R, Lackmy-Vallée A. Basic principles of transcranial magnetic stimulation  
 387 (TMS) and repetitive TMS (rTMS). *Ann Phys Rehabil Med* 2015;58:208–13.  
 388 <https://doi.org/10.1016/j.rehab.2015.05.005>.
- 389 [5] Mhalla A, Baudic S, Ciampi de Andrade D, Gautron M, Perrot S, Teixeira MJ, et al. Long-term  
 390 maintenance of the analgesic effects of transcranial magnetic stimulation in fibromyalgia.  
 391 *Pain* 2011;152:1478–85. <https://doi.org/10.1016/j.pain.2011.01.034>.
- 392 [6] Lefaucheur JP, Drouot X, Ménard-Lefaucheur I, Keravel Y, Nguyen JP. Motor cortex rTMS  
 393 restores defective intracortical inhibition in chronic neuropathic pain. *Neurology*  
 394 2006;67:1568–74. <https://doi.org/10.1212/01.wnl.0000242731.10074.3c>.
- 395 [7] Gordon EM, Chauvin RJ, Van AN, Rajesh A, Nielsen A, Newbold DJ, et al. A somato-cognitive  
 396 action network alternates with effector regions in motor cortex. *Nature* 2023.  
 397 <https://doi.org/10.1038/s41586-023-05964-2>.
- 398 [8] Pagano RL, Fonoff ET, Dale CS, Ballester G, Teixeira MJ, Britto LRG. Motor cortex stimulation  
 399 inhibits thalamic sensory neurons and enhances activity of PAG neurons: Possible pathways  
 400 for antinociception. *Pain* 2012;153:2359–69. <https://doi.org/10.1016/j.pain.2012.08.002>.
- 401 [9] Rosanova M, Casali A, Bellina V, Resta F, Mariotti M, Massimini M. Natural frequencies of  
 402 human corticothalamic circuits. *Journal of Neuroscience* 2009;29:7679–85.  
 403 <https://doi.org/10.1523/JNEUROSCI.0445-09.2009>.
- 404 [10] Casarotto S, Fecchio M, Rosanova M, Varone G, D’Ambrosio S, Sarasso S, et al. The rt-TEP  
 405 tool: real-time visualization of TMS-Evoked Potentials to maximize cortical activation and  
 406 minimize artifacts. *J Neurosci Methods* 2022;370:109486.  
 407 <https://doi.org/10.1016/j.jneumeth.2022.109486>.
- 408 [11] Tremblay S, Rogasch NC, Premoli I, Blumberger DM, Casarotto S, Chen R, et al. Clinical utility  
 409 and prospective of TMS – EEG. *Clinical Neurophysiology* 2019;130:802–44.  
 410 <https://doi.org/10.1016/j.clinph.2019.01.001>.
- 411 [12] Pfurtscheller G, Stancsik Jr A, Edlinger G. On the existence of different types of central beta  
 412 rhythms below 30 Hz. vol. 102. 1997.
- 413 [13] Fecchio M, Pigorini A, Comanducci A, Sarasso S, Casarotto S, Premoli I, et al. The spectral  
 414 features of EEG responses to transcranial magnetic stimulation of the primary motor cortex  
 415 depend on the amplitude of the motor evoked potentials. *PLoS One* 2017;12:1–15.  
 416 <https://doi.org/10.1371/journal.pone.0184910>.
- 417 [14] Torrecillos F, Falato E, Pogosyan A, West T, Di Lazzaro V, Brown P. Motor cortex inputs at the  
 418 optimum phase of beta cortical oscillations undergo more rapid and less variable  
 419 corticospinal propagation. *Journal of Neuroscience* 2020;40:369–81.  
 420 <https://doi.org/10.1523/JNEUROSCI.1953-19.2019>.
- 421 [15] Forschack N, Nierhaus T, Müller MM, Villringer A. Alpha-band brain oscillations shape the  
 422 processing of perceptible as well as imperceptible somatosensory stimuli during selective



- 423 attention. *Journal of Neuroscience* 2017;37:6983–94.  
 424 <https://doi.org/10.1523/JNEUROSCI.2582-16.2017>.
- 425 [16] Vernet M, Bashir S, Yoo WK, Perez JM, Najib U, Pascual-Leone A. Insights on the neural basis  
 426 of motor plasticity induced by theta burst stimulation from TMS-EEG. *European Journal of*  
 427 *Neuroscience* 2013;37:598–606. <https://doi.org/10.1111/ejn.12069>.
- 428 [17] Rocchi L, Ibáñez J, Benussi A, Hannah R, Rawji V, Casula E, et al. Variability and predictors of  
 429 response to continuous theta burst stimulation: A TMS-EEG study. *Front Neurosci* 2018;12.  
 430 <https://doi.org/10.3389/fnins.2018.00400>.
- 431 [18] Bai Z, Zhang J, Fong KNK. Intermittent theta burst stimulation to the primary motor cortex  
 432 reduces cortical inhibition: A TMS-EEG study. *Brain Sci* 2021;11.  
 433 <https://doi.org/10.3390/brainsci11091114>.
- 434 [19] Bergmann TO, Varatheeswaran R, Hanlon CA, Madsen KH, Thielscher A, Siebner HR.  
 435 Concurrent TMS-fMRI for causal network perturbation and proof of target engagement.  
 436 *Neuroimage* 2021;237. <https://doi.org/10.1016/j.neuroimage.2021.118093>.
- 437 [20] Jung JY, Bungert A, Bowtell R, Jackson SR. Modulating Brain Networks With Transcranial  
 438 Magnetic Stimulation Over the Primary Motor Cortex: A Concurrent TMS/fMRI Study. *Front*  
 439 *Hum Neurosci* 2020;14. <https://doi.org/10.3389/fnhum.2020.00031>.
- 440 [21] Rossi S, Antal A, Bestmann S, Bikson M, Brewer C, Brockmüller J, et al. Safety and  
 441 recommendations for TMS use in healthy subjects and patient populations, with updates on  
 442 training, ethical and regulatory issues: Expert Guidelines. *Clinical Neurophysiology*  
 443 2021;132:269–306. <https://doi.org/10.1016/j.clinph.2020.10.003>.
- 444 [22] Attal N, Poindessous-Jazat F, De Chauvigny E, Quesada C, Mhalla A, Ayache SS, et al.  
 445 Repetitive transcranial magnetic stimulation for neuropathic pain: a randomized multicentre  
 446 sham-controlled trial. *Brain* 2021;3328–39. <https://doi.org/10.1093/brain/awab208>.
- 447 [23] Rossini PM, Burke D, Chen R, Cohen LG, Daskalakis Z, Iorio R Di, et al. Non-invasive electrical  
 448 and magnetic stimulation of the brain, spinal cord, roots and peripheral nerves: Basic  
 449 principles and procedures for routine clinical and research application. An updated report  
 450 from an I.F.C.N. Committee. *Clinical Neurophysiology* 2015;126:1071–107.  
 451 <https://doi.org/10.1016/j.clinph.2015.02.001>.
- 452 [24] Russo S, Sarasso S, Puglisi GE, Dal Palù D, Pigorini A, Casarotto S, et al. TAAC - TMS Adaptable  
 453 Auditory Control: A universal tool to mask TMS clicks. *J Neurosci Methods* 2022;370:109491.  
 454 <https://doi.org/10.1016/j.jneumeth.2022.109491>.
- 455 [25] Mylius V, Ayache SS, Ahdab R, Farhat WH, Zouari HG, Belke M, et al. Definition of DLPFC and  
 456 M1 according to anatomical landmarks for navigated brain stimulation: Inter-rater reliability,  
 457 accuracy, and influence of gender and age. *Neuroimage* 2013;78:224–32.  
 458 <https://doi.org/10.1016/j.neuroimage.2013.03.061>.
- 459 [26] Carmi L, Alyagon U, Barnea-Ygael N, Zohar J, Dar R, Zangen A. Clinical and  
 460 electrophysiological outcomes of deep TMS over the medial prefrontal and anterior cingulate  
 461 cortices in OCD patients. *Brain Stimul* 2018;11:158–65.  
 462 <https://doi.org/10.1016/j.brs.2017.09.004>.
- 463 [27] da Cunha PHM, Tanaka H, Lapa JD da S, Dongyang L, Boa Sorte AA, Pereira TMR, et al. The  
 464 fast-posterior superior insula (Fast-PSI): A neuronavigation-free targeting method for non-  
 465 invasive neuromodulation. *Brain Stimul* 2022;15:1178–80.  
 466 <https://doi.org/10.1016/j.brs.2022.08.009>.
- 467 [28] Casarotto S, Lauro LJR, Bellina V, Casali AG, Rosanova M, Pigorini A, et al. EEG responses to  
 468 TMS are sensitive to changes in the perturbation parameters and repeatable over time. *PLoS*  
 469 *One* 2010;5. <https://doi.org/10.1371/journal.pone.0010281>.
- 470 [29] Delorme A, Makeig S. EEGLAB : an open source toolbox for analysis of single-trial EEG  
 471 dynamics including independent component analysis. *J Neurosci Methods* 2004;134:9–21.  
 472 <https://doi.org/10.1016/j.jneumeth.2003.10.009>.

- 473 [30] D'Ambrosio S, Jiménez-Jiménez D, Silvennoinen K, Zagaglia S, Perulli M, Poole J, et al.  
474 Physiological symmetry of transcranial magnetic stimulation-evoked EEG spectral features.  
475 *Hum Brain Mapp* 2022;43:5465–77. <https://doi.org/10.1002/hbm.26022>.
- 476 [31] Donati FL, Mayeli A, Sharma K, Janssen SA, Lagoy AD, Casali AG, et al. Natural Oscillatory  
477 Frequency Slowing in the Premotor Cortex of Early-Course Schizophrenia Patients: A TMS-  
478 EEG Study. *Brain Sci* 2023;13. <https://doi.org/10.3390/brainsci13040534>.
- 479 [32] Vinck M, Oostenveld R, Van Wingerden M, Battaglia F, Pennartz CMA. An improved index of  
480 phase-synchronization for electrophysiological data in the presence of volume-conduction,  
481 noise and sample-size bias. *Neuroimage* 2011;55:1548–65.  
482 <https://doi.org/10.1016/j.neuroimage.2011.01.055>.
- 483 [33] Maris E, Oostenveld R. Nonparametric statistical testing of EEG- and MEG-data. *J Neurosci*  
484 *Methods* 2007;164:177–90. <https://doi.org/10.1016/j.jneumeth.2007.03.024>.
- 485 [34] Oostenveld R, Fries P, Maris E, Schoffelen JM. FieldTrip: Open source software for advanced  
486 analysis of MEG, EEG, and invasive electrophysiological data. *Comput Intell Neurosci*  
487 2011;2011. <https://doi.org/10.1155/2011/156869>.
- 488 [35] Thut G, Veniero D, Romei V, Miniussi C, Schyns P, Gross J. Rhythmic TMS causes local  
489 entrainment of natural oscillatory signatures. *Current Biology* 2011;21:1176–85.  
490 <https://doi.org/10.1016/j.cub.2011.05.049>.
- 491 [36] Hannah R, Muralidharan V, Aron AR. Motor cortex oscillates at its intrinsic post-movement  
492 beta rhythm following real (but not sham) single pulse, rhythmic and arrhythmic transcranial  
493 magnetic stimulation. *Neuroimage* 2022;251.  
494 <https://doi.org/10.1016/j.neuroimage.2022.118975>.
- 495 [37] Parto-Dezfouli M, Vezoli J, Bosman CA, Fries P. Enhanced behavioral performance through  
496 interareal gamma and beta synchronization. *Cell Rep* 2023;42.  
497 <https://doi.org/10.1016/j.celrep.2023.113249>.
- 498 [38] Fries P. A mechanism for cognitive dynamics: Neuronal communication through neuronal  
499 coherence. *Trends Cogn Sci* 2005;9:474–80. <https://doi.org/10.1016/j.tics.2005.08.011>.
- 500 [39] Fries P. Rhythms for Cognition: Communication through Coherence. *Neuron* 2015;88:220–35.  
501 <https://doi.org/10.1016/j.neuron.2015.09.034>.
- 502 [40] Roopun AK, Kramer MA, Carracedo LM, Kaiser M, Davies CH, Traub RD, et al. Temporal  
503 Interactions between Cortical Rhythms. *Front Neurosci* 2008;2:145–54.  
504 <https://doi.org/10.3389/neuro.01.034.2008>.
- 505 [41] Canolty RT, Knight RT. The functional role of cross-frequency coupling. *Trends Cogn Sci*  
506 2010;14:506–15. <https://doi.org/10.1016/j.tics.2010.09.001>.
- 507 [42] Kadono Y, Koguchi K, Okada K ichi, Hosomi K, Hiraishi M, Ueguchi T, et al. Repetitive  
508 transcranial magnetic stimulation restores altered functional connectivity of central  
509 poststroke pain model monkeys. *Sci Rep* 2021;11. <https://doi.org/10.1038/s41598-021-85409-w>.
- 510 [43] Maarrawi J, Peyron R, Mertens P, Costes N, Magnin M, Sindou M, et al. Motor cortex  
511 stimulation for pain control induces changes in the endogenous opioid system. *Neurology*  
512 2007;69:827–34. <https://doi.org/10.1212/01.wnl.0000269783.86997.37>.
- 513 [44] Ciampi De Andrade D, Mhalla A, Adam F, Texeira MJ, Bouhassira D. Neuropharmacological  
514 basis of rTMS-induced analgesia: The role of endogenous opioids. *Pain* 2011;152:320–6.  
515 <https://doi.org/10.1016/j.pain.2010.10.032>.
- 516 [45] Bestmann S, Baudewig J, Siebner HR, Rothwell JC, Frahm J. Subthreshold high-frequency TMS  
517 of human primary motor cortex modulates interconnected frontal motor areas as detected  
518 by interleaved fMRI-TMS. *Neuroimage* 2003;20:1685–96.  
519 <https://doi.org/10.1016/j.neuroimage.2003.07.028>.
- 520 [46] Hodkinson DJ, Bungert A, Bowtell R, Jackson SR, Jung JY. Operculo-insular and anterior  
521 cingulate plasticity induced by transcranial magnetic stimulation in the human motor cortex:  
522

523 A dynamic casual modeling study. *J Neurophysiol* 2021;125:1180–90.  
524 <https://doi.org/10.1152/jn.00670.2020>.

525 [47] Kim YH, You SH, Ko MH, Park JW, Lee KH, Jang SH, et al. Repetitive transcranial magnetic  
526 stimulation-induced corticomotor excitability and associated motor skill acquisition in  
527 chronic stroke. *Stroke* 2006;37:1471–6.  
528 <https://doi.org/10.1161/01.STR.0000221233.55497.51>.

529 [48] Di Lazzaro V, Dileone M, Pilato F, Capone F, Musumeci G, Ranieri F, et al. Modulation of  
530 motor cortex neuronal networks by rTMS: Comparison of local and remote effects of six  
531 different protocols of stimulation. *J Neurophysiol* 2011;105:2150–6.  
532 <https://doi.org/10.1152/jn.00781.2010>.

533

534

535 **FIGURE LEGENDS**

536 **Figure 1:** Sample data of transcranial magnetic stimulation (TMS)-evoked potentials recorded with  
537 EEG following single pulse stimulation to the left primary motor cortex (M1) in a representative  
538 participant. **A)** Topographical representation of M1 TEPs for each individual electrode. The red dot  
539 corresponds to the area of stimulation. The butterfly plot shown below depicts the superposition of  
540 TEPs for all electrodes. The red line corresponds to the C3 electrode, and the blue lines correspond  
541 to the other 62 channels. **B)** Mean broadband event-related spectral perturbation (ERSP) over time  
542 on C3 (time: from -100 to 350 ms). Below is the ERSP map calculated on the same electrode. **C)**  
543 Mean broadband intertrial coherence (ITC) over time on C3 (time: from -100 to 350 ms). Below is  
544 the ITC map calculated on the same electrode.

545 **Figure 2:** Sample data of transcranial magnetic stimulation (TMS)-evoked potentials recorded with  
546 EEG following single pulse stimulation to the left dorsolateral prefrontal cortex (DLPFC) in a  
547 representative participant. **A)** Topographical representation of DLPFC TEPs for each individual  
548 electrode. The red dot corresponds to the area of stimulation. The butterfly plot is shown below. The  
549 red line corresponds to the F1 electrode, and the blue lines correspond to the other 62 channels. **B)**  
550 Mean broadband event-related spectral perturbation (ERSP) over time on F1 (time: from -100 to 350  
551 ms). Below is the ERSP map calculated on the same electrode. **C)** Mean broadband intertrial  
552 coherence (ITC) over time on F1 (time: from -100 to 350 ms). Below is the ITC map calculated on  
553 the same electrode.

554 **Figure 3:** Sample data of transcranial magnetic stimulation (TMS)-evoked potentials recorded with  
555 EEG following single pulse stimulation to the anterior cingulate cortex (ACC) in a representative  
556 participant. **A)** Topographical representation of ACC TEPs for each individual electrode. The  
557 butterfly plot is shown below. The red line corresponds to the FCz electrode, and the blue lines  
558 correspond to the other 62 channels. **B)** Mean broadband event-related spectral perturbation (ERSP)  
559 over time on FCz (time: from -100 to 350 ms). Below is the ERSP map calculated on the same  
560 electrode. **C)** Mean broadband intertrial coherence (ITC) over time on FCz (time: from -100 to 350  
561 ms). Below is the ITC map calculated on the same electrode.

562 **Figure 4** Sample data of transcranial magnetic stimulation (TMS)-evoked potentials recorded with  
563 EEG following single pulse stimulation to the posterosuperior insula (PSI) in a representative  
564 participant. **A)** Topographical representation of PSI TEPs for each individual electrode. The butterfly  
565 plot is shown below. The red line corresponds to the FC7 electrode, and the blue lines correspond to  
566 the other 62 channels. **B)** Mean broadband event-related spectral perturbation (ERSP) over time on

567 FC7 (time: from -100 to 350 ms). Below is the ERSP map calculated on the same electrode. C) Mean  
568 broadband intertrial coherence (ITC) over time on FC7 (time: from -100 to 350 ms). Below is the  
569 ITC map calculated on the same electrode.

570 **Figure 5:** Topographic maps of the average difference between active and sham rTMS for the  
571 spatiotemporal clusters of ITC (left, high- $\beta$  band) and ERSP (right, low- $\beta$  band) found significant.  
572 Average P-values and time intervals of the significant clusters are displayed below.

573

574 **Figure 1**

A

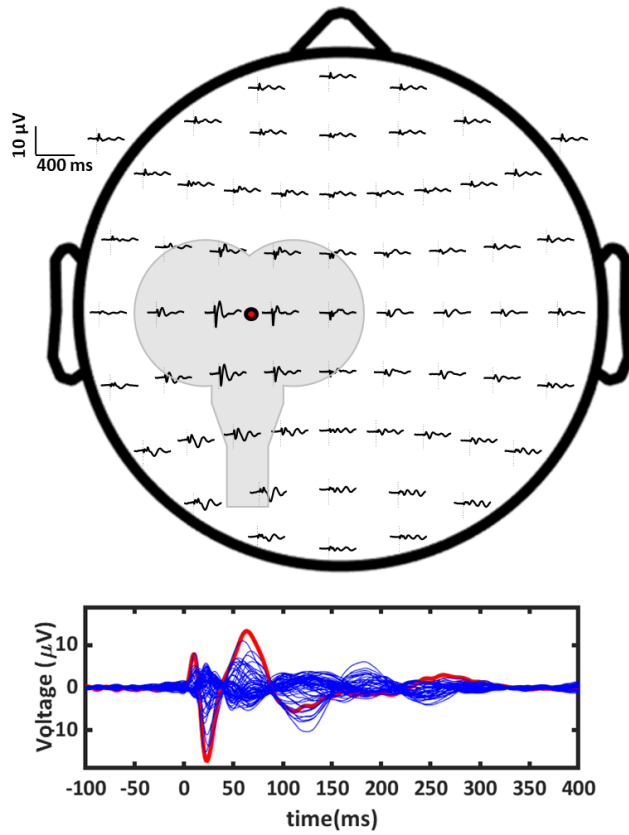

B

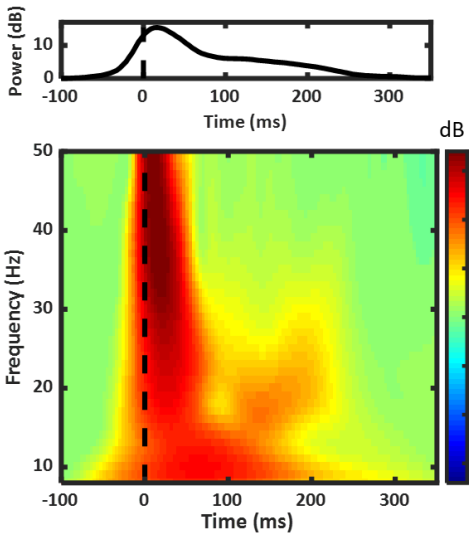

C

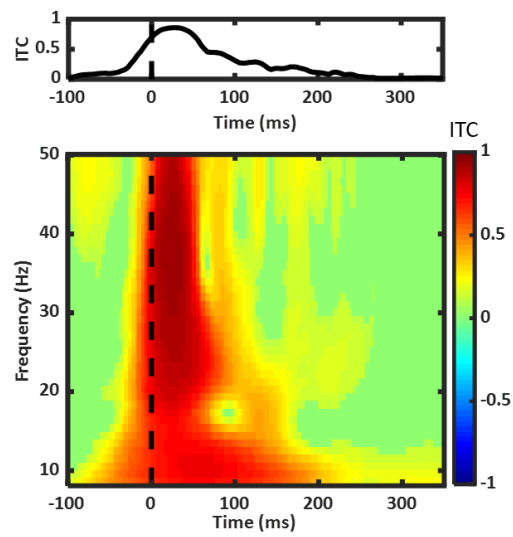

575  
576

577 **Figure 2**

A

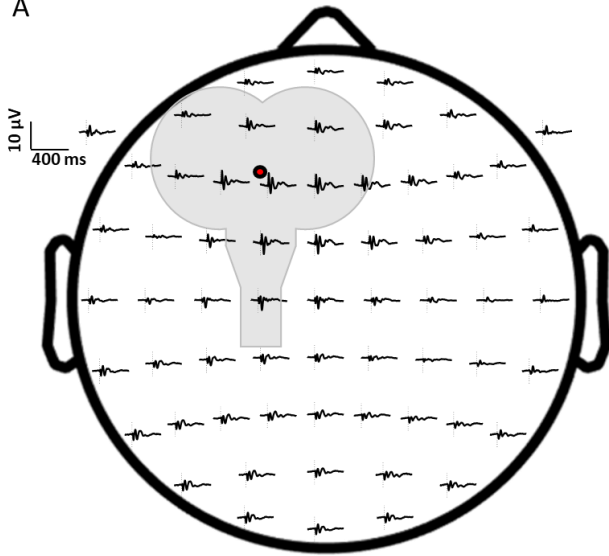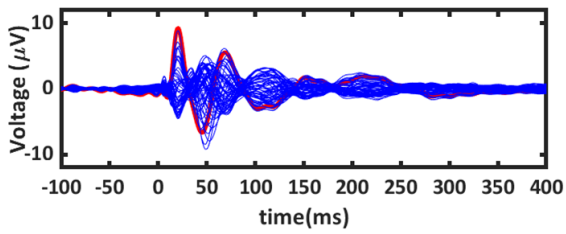

B

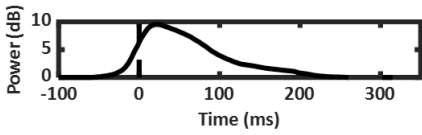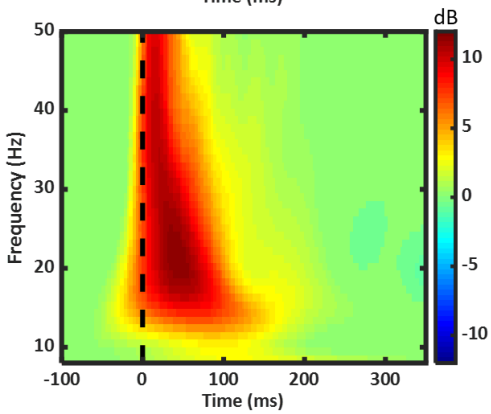

C

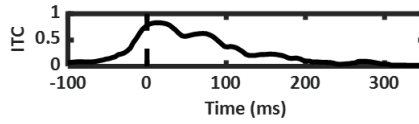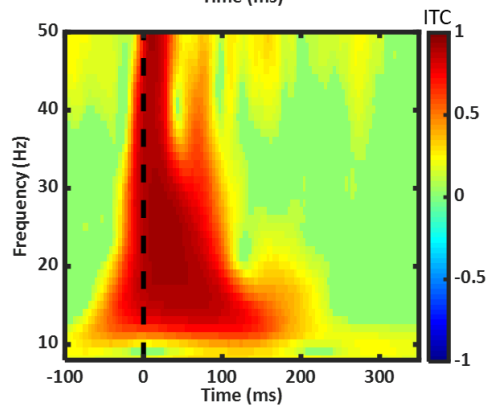

578  
579  
580

581 **Figure 3**

A

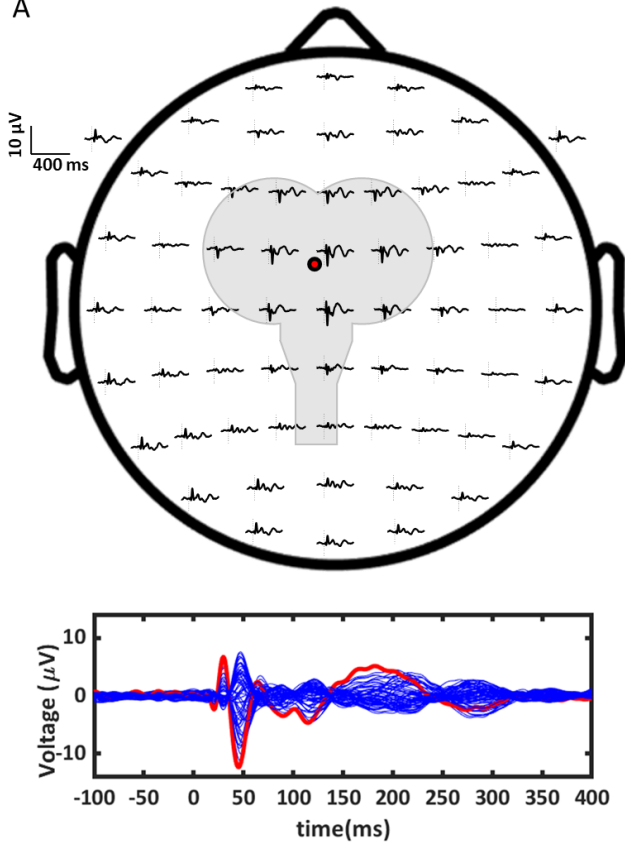

B

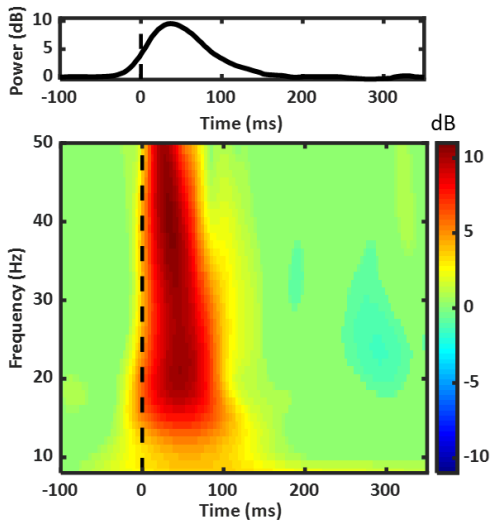

C

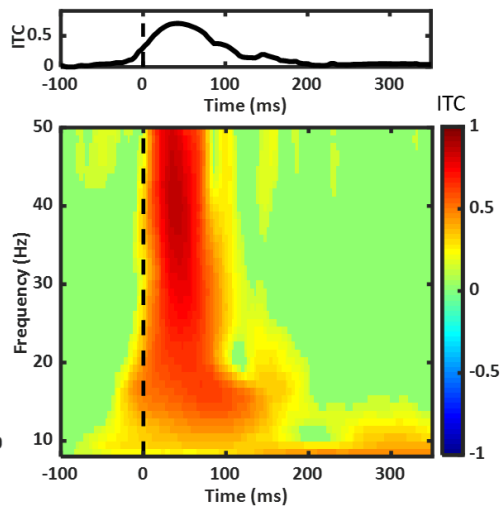

582  
583



584 **Figure 4**

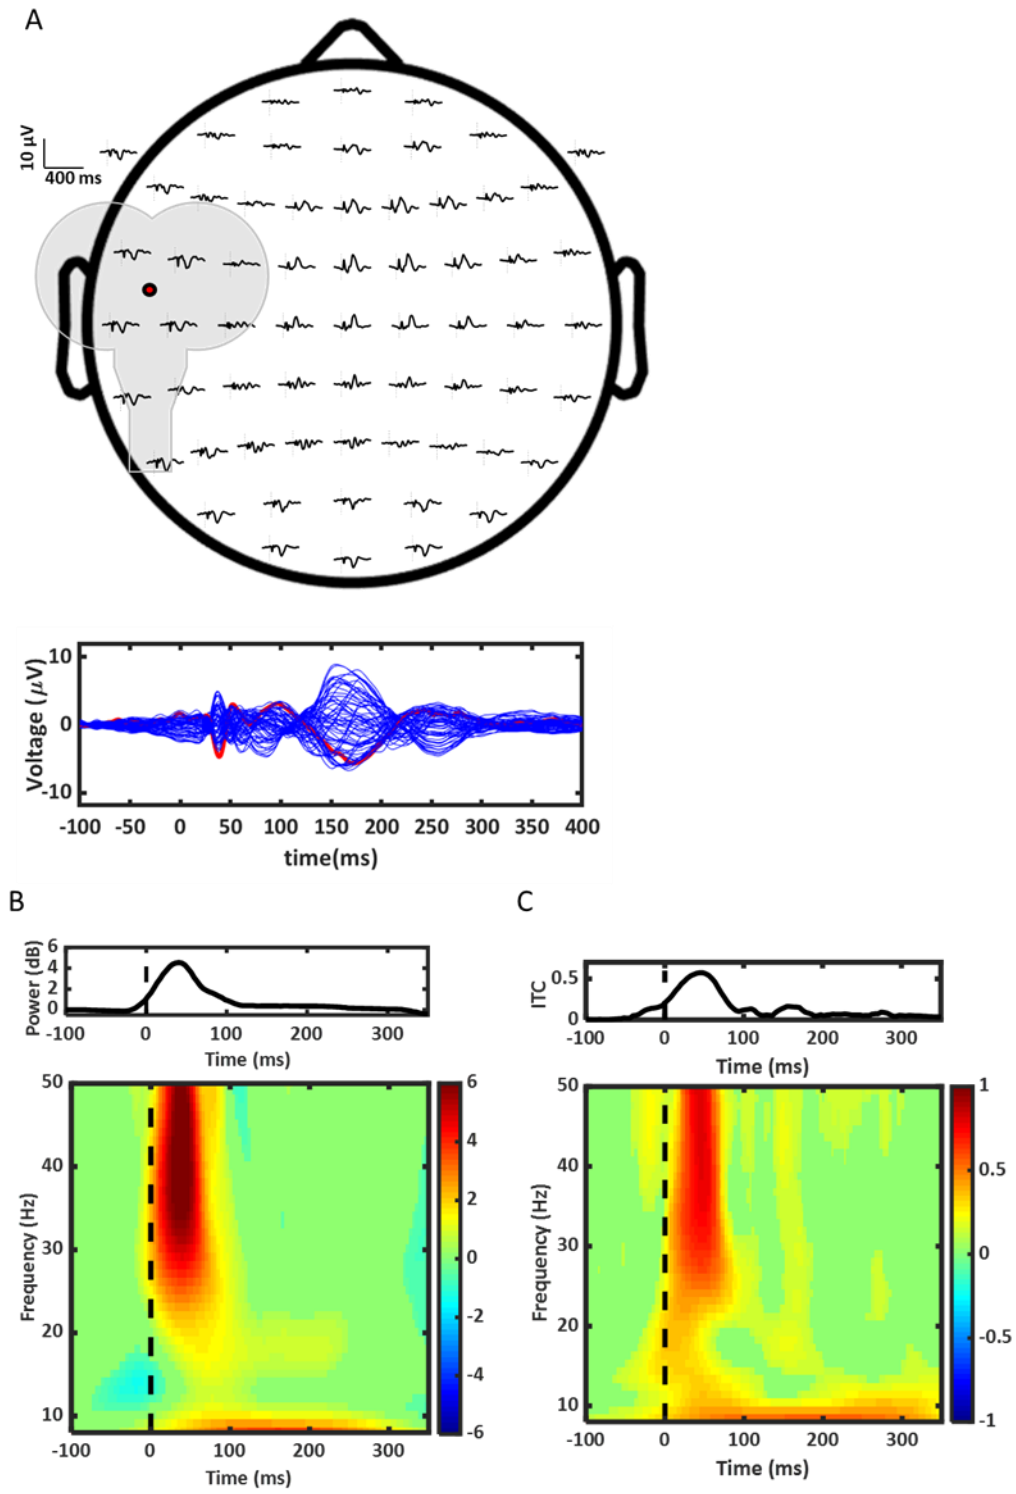

585  
586

587 **Figure 5**

ITC over High- $\beta$  (25-35Hz)

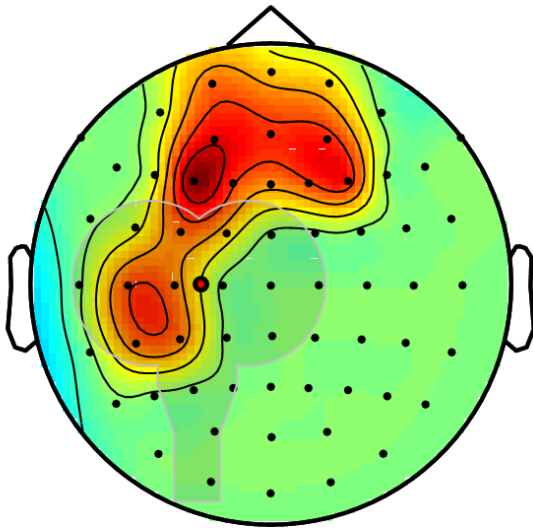

Time interval from 48 to 83 ms  
Average P-value = 0.0256

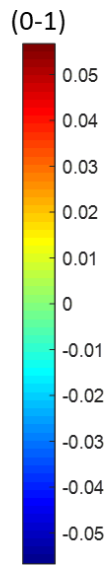

ERSP over Low- $\beta$  (14-24Hz)

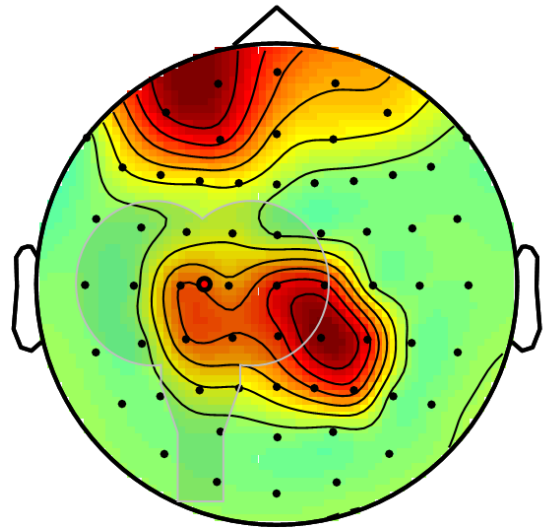

Time interval from 86 to 144 ms  
Average P-value = 0.0060

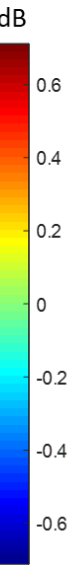

588  
589

590 **TABLES**591 **Table 1.**

592 Mean  $\pm$  standard deviation of the high- $\beta$  band inter-trial coherence (0-1) for each condition before  
 593 and immediately after repetitive transcranial magnetic stimulation (rTMS) to the primary motor  
 594 cortex. Two regions in the 48-83 ms time interval were selected based on significant effects when  
 595 analyzing the differences in non-parametric permutation tests.

596

| <b>Cluster</b> | <b>Condition</b> | <b>Pre-rTMS</b> | <b>Post-rTMS</b> | <b>Absolute change</b> |
|----------------|------------------|-----------------|------------------|------------------------|
| Left central   | Sham             | 0.46 $\pm$ 0.17 | 0.44 $\pm$ 0.20  | -0.02 $\pm$ 0.08       |
|                | Active           | 0.44 $\pm$ 0.17 | 0.48 $\pm$ 0.16  | 0.04 $\pm$ 0.05        |
|                | p-value          |                 |                  | 0.005                  |
| Left frontal   | Sham             | 0.43 $\pm$ 0.18 | 0.40 $\pm$ 0.18  | -0.02 $\pm$ 0.09       |
|                | Active           | 0.41 $\pm$ 0.16 | 0.46 $\pm$ 0.16  | 0.04 $\pm$ 0.07        |
|                | p-value          |                 |                  | 0.026                  |
| Right frontal  | Sham             | 0.38 $\pm$ 0.17 | 0.35 $\pm$ 0.15  | -0.03 $\pm$ 0.09       |
|                | Active           | 0.35 $\pm$ 0.17 | 0.38 $\pm$ 0.16  | 0.04 $\pm$ 0.06        |
|                | p-value          |                 |                  | 0.001                  |

597

598 **Table 2.**

599 Mean  $\pm$  standard deviation of the low- $\beta$  band event-related spectral perturbation (dB) for each  
 600 condition before and immediately after repetitive transcranial magnetic stimulation (rTMS) to the  
 601 primary motor cortex. Four regions in the 86-144 ms time interval were selected based on significant  
 602 effects when analyzing the differences in non-parametric permutation tests.

603

| <b>Cluster</b>        | <b>Condition</b> | <b>Pre-rTMS</b> | <b>Post-rTMS</b> | <b>Absolute change</b> |
|-----------------------|------------------|-----------------|------------------|------------------------|
| Left centro-parietal  | Sham             | 1.76 $\pm$ 1.15 | 1.27 $\pm$ 1.06  | -0.49 $\pm$ 0.69       |
|                       | Active           | 1.74 $\pm$ 1.50 | 1.75 $\pm$ 1.19  | 0.01 $\pm$ 0.69        |
|                       | p-value          |                 |                  | 0.009                  |
| Left prefrontal       | Sham             | 1.17 $\pm$ 1.01 | 0.83 $\pm$ 0.81  | -0.35 $\pm$ 0.50       |
|                       | Active           | 1.07 $\pm$ 0.82 | 1.33 $\pm$ 0.66  | 0.26 $\pm$ 0.56        |
|                       | p-value          |                 |                  | 0.001                  |
| Right centro-parietal | Sham             | 1.00 $\pm$ 0.84 | 0.73 $\pm$ 0.85  | -0.28 $\pm$ 0.69       |
|                       | Active           | 0.84 $\pm$ 0.71 | 1.23 $\pm$ 0.67  | 0.39 $\pm$ 0.66        |
|                       | p-value          |                 |                  | 0.002                  |

604

605 **Table 3.**

606 Mean  $\pm$  standard deviation of the weighted phase lag index (0-1) for each condition before and  
 607 immediately after repetitive transcranial magnetic stimulation (rTMS) to the primary motor cortex.  
 608 Two regions were selected based on significant effects when analyzing the differences in event-  
 609 related spectral perturbation and inter-trial coherence.

610

| <b>Clusters</b>                                                                  | <b>Condition</b> | <b>Pre-rTMS</b> | <b>Post-rTMS</b> | <b>Absolute change</b> |
|----------------------------------------------------------------------------------|------------------|-----------------|------------------|------------------------|
| High- $\beta$ band: left central-left prefrontal (time interval 48-83 ms)        | Sham             | 0.35 $\pm$ 0.13 | 0.32 $\pm$ 0.10  | -0.03 $\pm$ 0.08       |
|                                                                                  | Active           | 0.32 $\pm$ 0.12 | 0.35 $\pm$ 0.13  | 0.03 $\pm$ 0.07        |
|                                                                                  | p-value          |                 |                  | 0.024                  |
| High- $\beta$ band: left central-left prefrontal (time interval 86-144 ms)       | Sham             | 0.17 $\pm$ 0.05 | 0.14 $\pm$ 0.03  | -0.03 $\pm$ 0.05       |
|                                                                                  | Active           | 0.15 $\pm$ 0.06 | 0.17 $\pm$ 0.06  | 0.02 $\pm$ 0.07        |
|                                                                                  | p-value          |                 |                  | 0.044                  |
| Low- $\beta$ band: left central-right centro-parietal (time interval 86-144 ms)  | Sham             | 0.21 $\pm$ 0.07 | 0.18 $\pm$ 0.05  | -0.03 $\pm$ 0.07       |
|                                                                                  | Active           | 0.18 $\pm$ 0.04 | 0.21 $\pm$ 0.05  | 0.02 $\pm$ 0.05        |
|                                                                                  | p-value          |                 |                  | 0.023                  |
| High- $\beta$ band: left central-right centro-parietal (time interval 86-144 ms) | Sham             | 0.15 $\pm$ 0.05 | 0.14 $\pm$ 0.03  | -0.01 $\pm$ 0.04       |
|                                                                                  | Active           | 0.14 $\pm$ 0.03 | 0.17 $\pm$ 0.04  | 0.03 $\pm$ 0.04        |
|                                                                                  | p-value          |                 |                  | 0.003                  |

611

612 **SUPPLEMENTARY MATERIAL**

613 **Supplementary figure 1**

614 Global Mean Field Power (GMFP) and Local Mean Field Power (LMFP) from the primary motor  
615 cortex (M1) stimulation. Before repetitive transcranial magnetic stimulation (Pre-rTMS) is shown in  
616 blue, and immediately after repetitive transcranial magnetic stimulation (post-rTMS) is in red. Solid  
617 lines indicate the mean values, and dashed lines represent the standard deviation for each condition.  
618 **A) Sham rTMS 10 Hz rTMS to M1; B) Active rTMS 10 Hz rTMS to M1.**

619

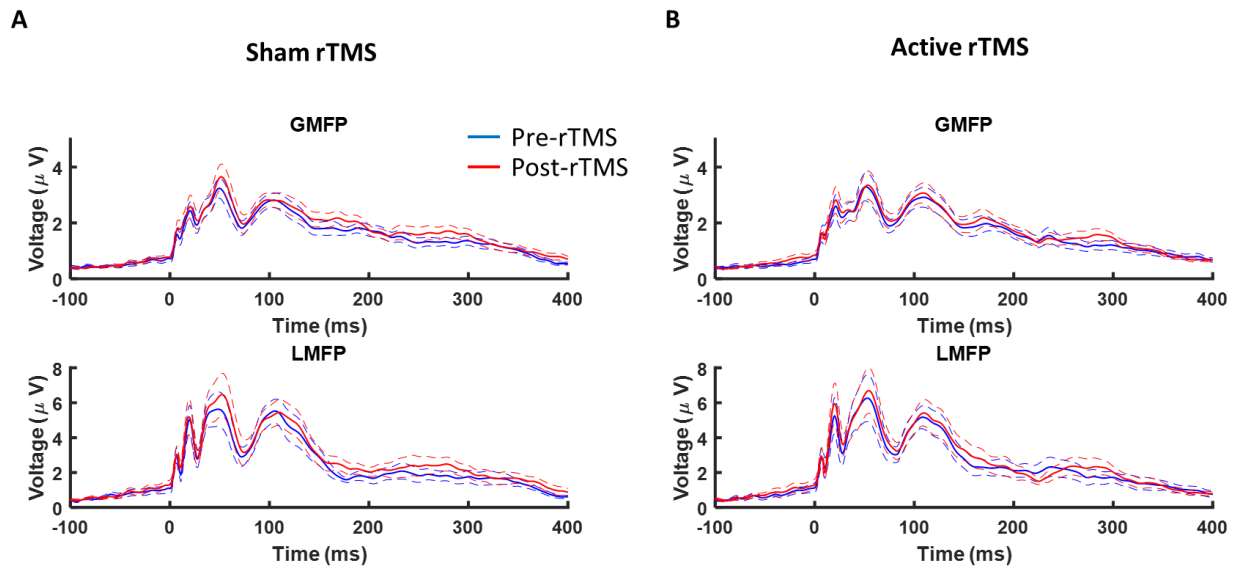

620

621

622

623 **Supplementary figure 2**

624 Global Mean Field Power (GMFP) and Local Mean Field Power (LMFP) from the dorsolateral  
625 prefrontal cortex (DLPFC) stimulation. Before repetitive transcranial magnetic stimulation (Pre-  
626 rTMS) is shown in blue, and immediately after repetitive transcranial magnetic stimulation (post-  
627 rTMS) is in red. Solid lines indicate the mean values, and dashed lines represent the standard deviation  
628 for each condition. **A) Sham rTMS 10 Hz rTMS to M1; B) Active rTMS 10 Hz rTMS to M1.**

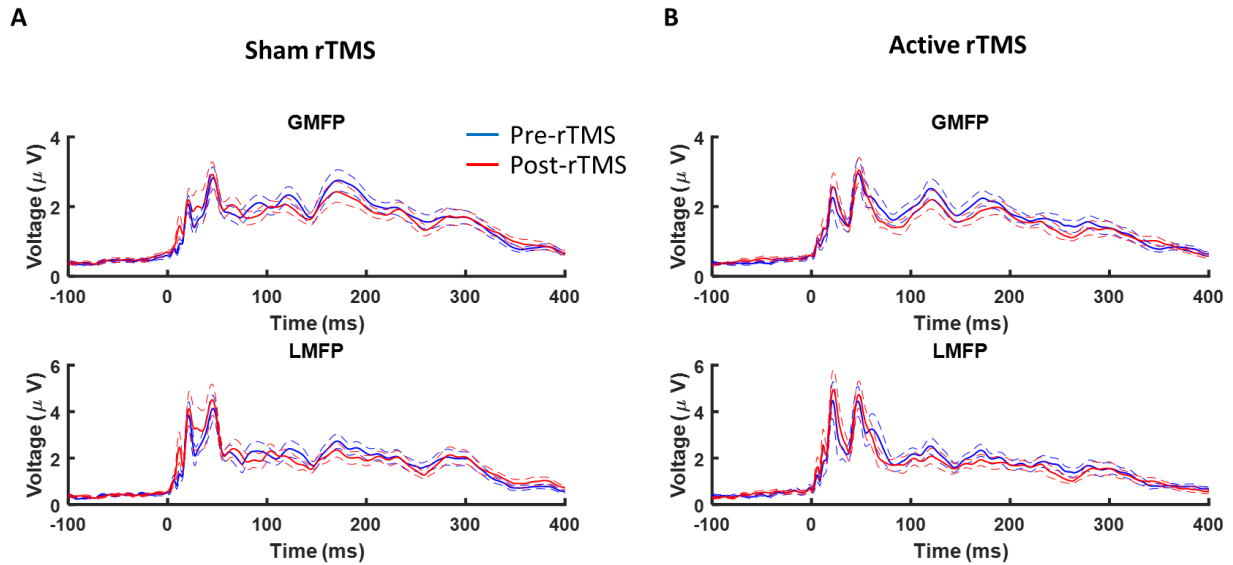

629  
630

631 **Supplementary figure 3**

632 Global Mean Field Power (GMFP) and Local Mean Field Power (LMFP) from the anterior cingulate  
633 cortex (ACC) stimulation. Before repetitive transcranial magnetic stimulation (Pre-rTMS) is shown  
634 in blue, and immediately after repetitive transcranial magnetic stimulation (post-rTMS) is in red.  
635 Solid lines indicate the mean values, and dashed lines represent the standard deviation for each  
636 condition. **A)** Sham rTMS 10 Hz rTMS to M1; **B)** Active rTMS 10 Hz rTMS to M1.

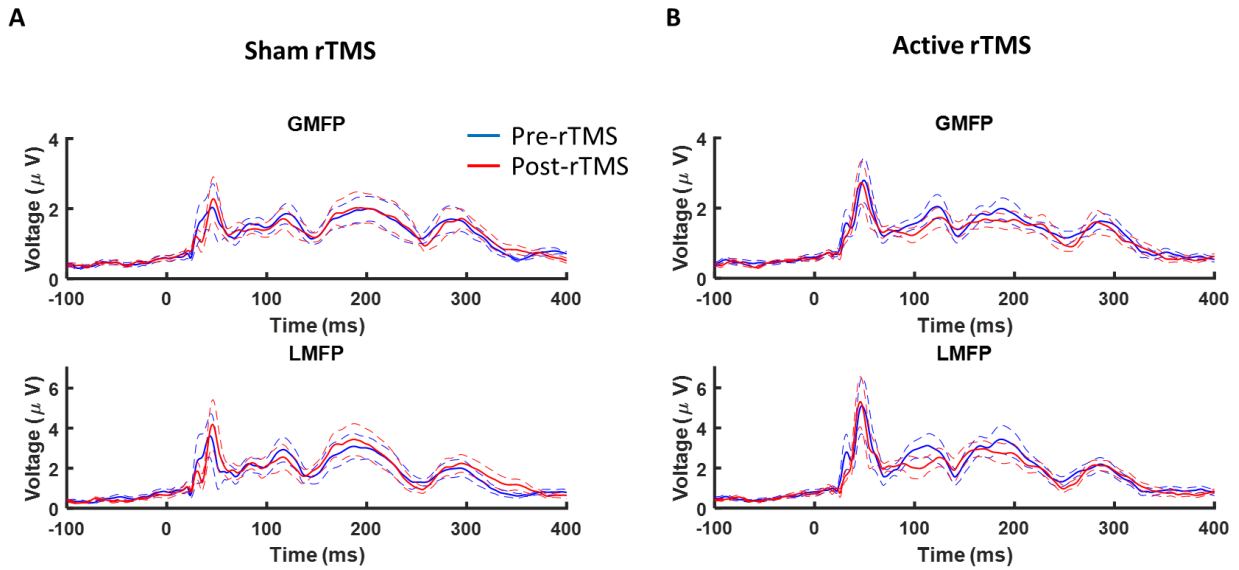

637  
638



639 **Supplementary figure 4**

640 Global Mean Field Power (GMFP) and Local Mean Field Power (LMFP) from the posterosuperior  
641 insula cortex (PSI) stimulation. Before repetitive transcranial magnetic stimulation (Pre-rTMS) is  
642 shown in blue, and immediately after repetitive transcranial magnetic stimulation (post-rTMS) is in  
643 red. Solid lines indicate the mean values, and dashed lines represent the standard deviation for each  
644 condition. **A)** Sham rTMS 10 Hz rTMS to M1; **B)** Active rTMS 10 Hz rTMS to M1.

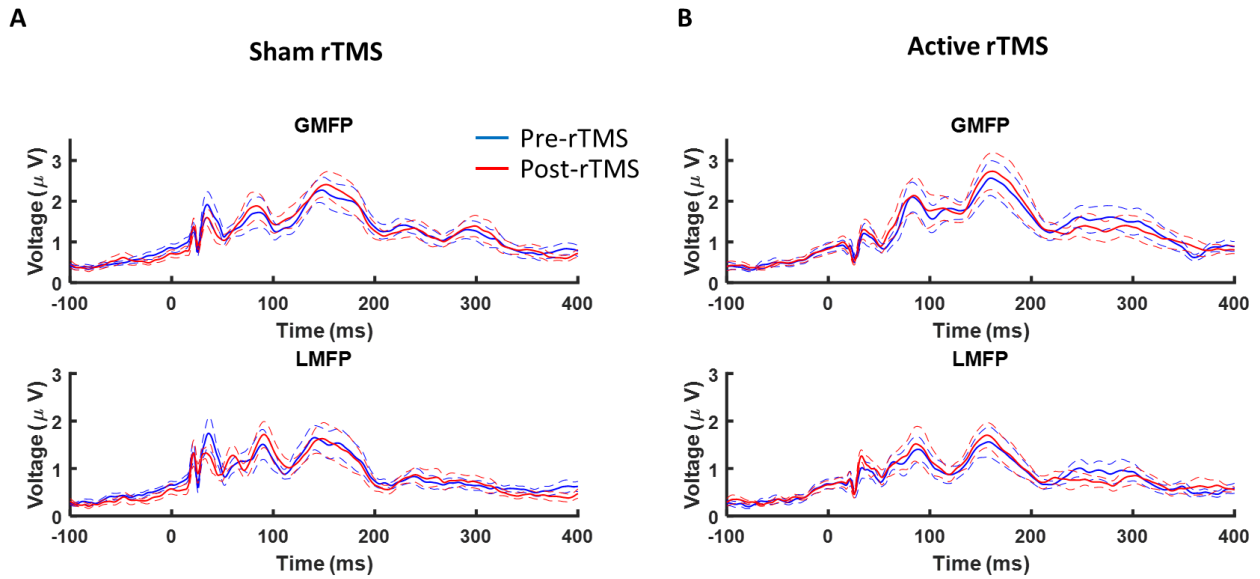

645  
646

647 **Supplementary Table 1.** Mean  $\pm$  standard deviation of Transcranial Magnetic Stimulation (TMS)  
 648 power intensity used for evoking TMS-evoked potentials for each cortical spot and for sham and  
 649 active repetitive transcranial magnetic stimulation (rTMS). For M1 and DLPFC, a figure-of-eight coil  
 650 was set to the first dorsal interosseous muscle rTMS, and for ACC and PSI, a double-cone coil was  
 651 set to the tibialis anterior muscle rTMS.

652

| Area  | Condition | Maximum stimulator output |
|-------|-----------|---------------------------|
| M1    | Sham      | 59.8% $\pm$ 6.9           |
|       | Active    | 60.1% $\pm$ 7.0           |
| DLPFC | Sham      | 73.1% $\pm$ 8.6           |
|       | Active    | 73.5% $\pm$ 8.2           |
| ACC   | Sham      | 37.9% $\pm$ 6.1           |
|       | Active    | 38.1% $\pm$ 6.0           |
| PSI   | Sham      | 40.8% $\pm$ 3.3           |
|       | Active    | 40.3% $\pm$ 3.7           |

663

664 M1 = motor cortex; DLPFC = dorsolateral prefrontal cortex; ACC = anterior cingulate cortex; PSI = postero-superior  
 665 insula cortex

666

667 **Supplementary Table 2.** Mean  $\pm$  standard deviation of the average number of artifact-free epochs  
 668 for each condition and for each cortical spot for sham and repetitive transcranial magnetic stimulation  
 669 (rTMS).

670

| <b>Area</b> | <b>Condition</b> | <b>Pre-rTMS</b> | <b>Post-rTMS</b> |
|-------------|------------------|-----------------|------------------|
| M1          | Sham             | 148 $\pm$ 16    | 149 $\pm$ 16     |
|             | Active           | 151 $\pm$ 16    | 151 $\pm$ 16     |
| DLPFC       | Sham             | 151 $\pm$ 21    | 150 $\pm$ 18     |
|             | Active           | 153 $\pm$ 19    | 152 $\pm$ 15     |
| ACC         | Sham             | 141 $\pm$ 15    | 138 $\pm$ 7      |
|             | Active           | 138 $\pm$ 18    | 137 $\pm$ 15     |
| PSI         | Sham             | 157 $\pm$ 6     | 155 $\pm$ 10     |
|             | Active           | 159 $\pm$ 8     | 158 $\pm$ 7      |

671

672 M1 = motor cortex; DLPFC = dorsolateral prefrontal cortex; ACC = anterior cingulate cortex; PSI = postero-superior  
 673 insula cortex

674

675 **Supplementary Table 3.** Mean  $\pm$  standard deviation of the motor-evoked potentials before and after  
 676 active and sham repetitive Transcranial Magnetic Stimulation (rTMS) to M1 at 120% and 140% of  
 677 resting motor threshold.

| <b>Variable</b>                | <b>Condition</b> | <b>Before rTMS</b> | <b>After rTMS</b>  |
|--------------------------------|------------------|--------------------|--------------------|
| <b>Motor-evoked potentials</b> |                  |                    |                    |
| MEPs 120% ( $\mu$ V)           | Sham rTMS        | 460.3 $\pm$ 393.3  | 596.3 $\pm$ 548.8  |
|                                | Active rTMS      | 616.2 $\pm$ 489.4  | 657.8 $\pm$ 647.6  |
| MEPs 140% ( $\mu$ V)           | Sham rTMS        | 963.3 $\pm$ 609.8  | 1091.8 $\pm$ 801.8 |
|                                | Active rTMS      | 1150.2 $\pm$ 800.5 | 1166.8 $\pm$ 904.5 |

678  
 679
